# Supplementary material
Source: PubMed Central journal article supplement (PMC3323115)
Supplement: NIHMS104873-supplement-suppl_table.pdf [file NIHMS104873-supplement-suppl_table.pdf]

**Supplementary Table 1**      **MRP4 G2269A (E857K) allele frequency**

|                          | rs3765534 Frequency % (number of alleles) |             |               |
|--------------------------|-------------------------------------------|-------------|---------------|
| Population               | Our data from Coriell ethnic populations  | Hapmap#     | PharmGKB*     |
| Ashkenazi Jewish         | 0 (n = 22 alleles)                        | -           | -             |
| Africans North of Sahara | 0 (n = 12 alleles)                        | -           | -             |
| Pacific Islanders        | 0 (n = 16 alleles)                        | -           | -             |
| Middle Eastern           | 1.8 (n = 56 alleles)                      | -           | -             |
| Japanese                 | 10.0 (n = 20 alleles)                     | 18.6 (n=86) | 20.37 (n=108) |
| European American        | -                                         | 0 (n=120)   | 1.25 (n=160)  |
| African American         | -                                         | 0 (n=120)   | 2.5 (n=160)   |
| Chinese American         | -                                         | 7.1 (n=84)  | 4.44 (n=90)   |

# From Hapmap: [http://www.ncbi.nlm.nih.gov/SNP/snp\\_ref.cgi?rs=3765534](http://www.ncbi.nlm.nih.gov/SNP/snp_ref.cgi?rs=3765534)

\*From the PharmGKB database:

(<http://www.pharmgkb.org/views/reports/loadFrequencyInSampleSets.action?varRptId=144334665>)
