# Supplementary material
Source: PubMed Central journal article supplement (PMC3323115)

**a**

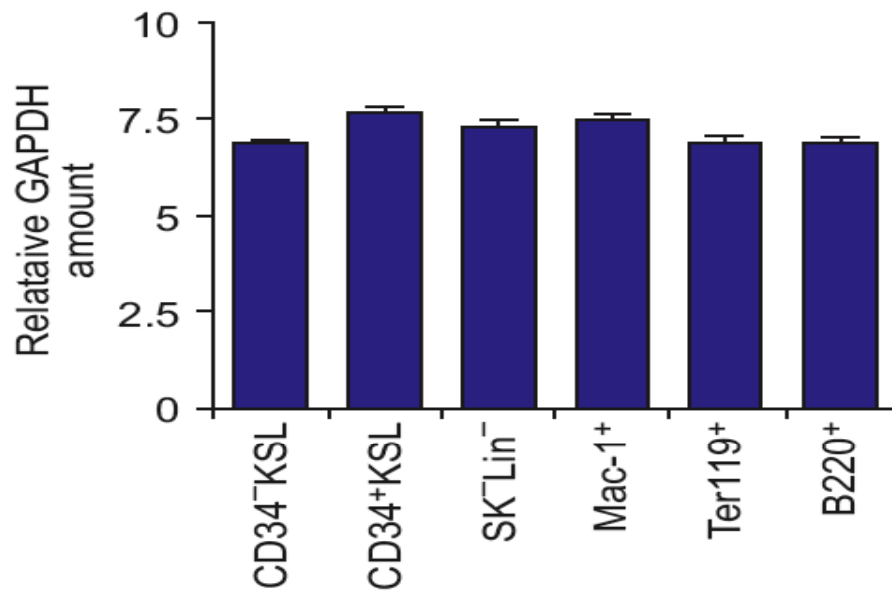

**b**

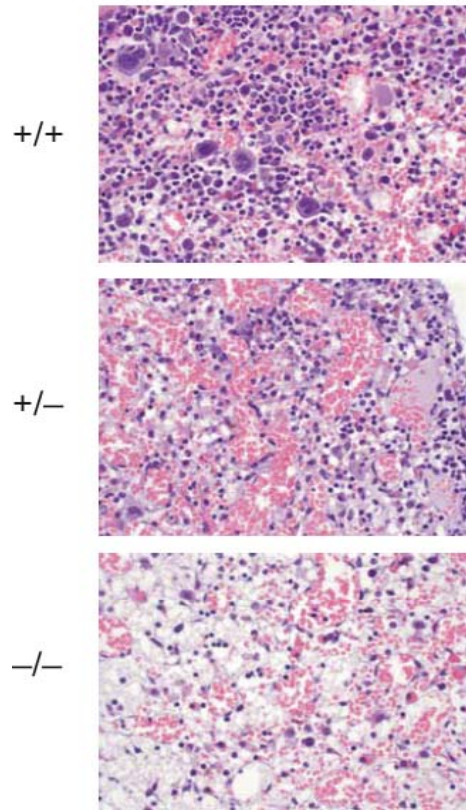

c

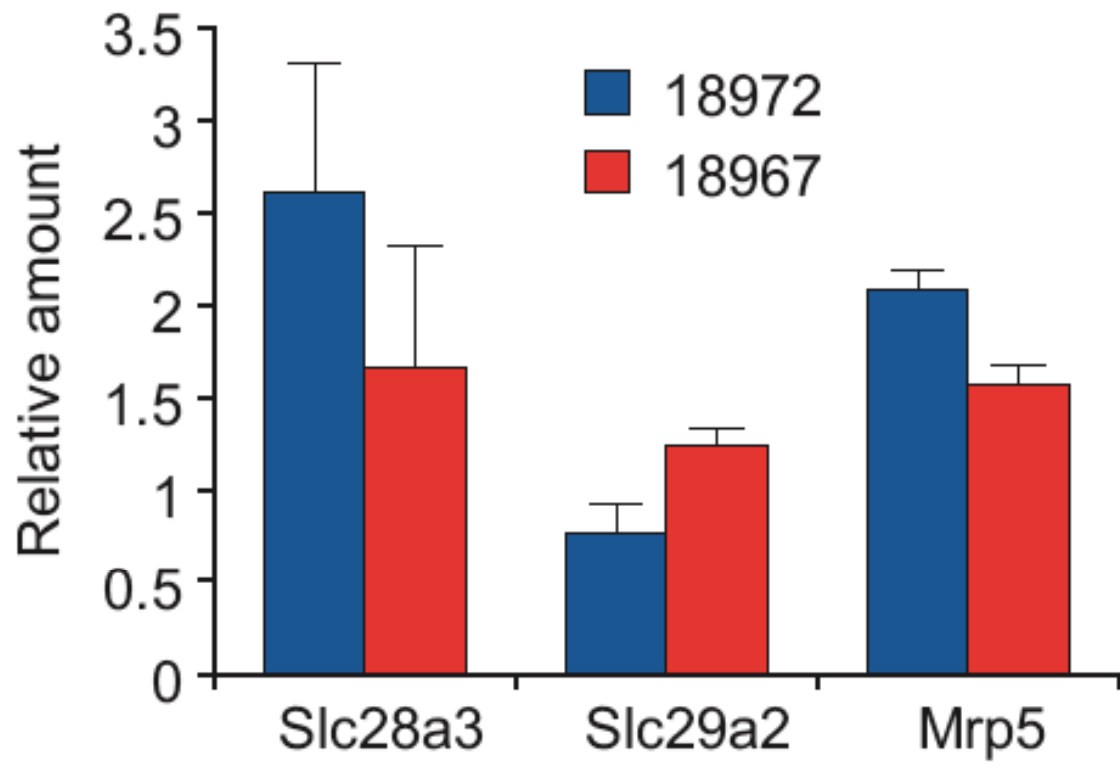

Supplement: NIHMS104873-supplement-suppl_fig.pdf [file NIHMS104873-supplement-suppl_fig.pdf]
